# Supplementary material for: Circulating extracellular vesicles expressing PD1 and PD-L1 predict response and mediate resistance to checkpoint inhibitors immunotherapy in metastatic melanoma
Source: PubMed Central journal article supplement (PMC8764806; doi:10.1186/s12943-021-01490-9), 2022-01-18
Supplement: 12943_2021_1490_MOESM1_ESM.pdf [file 12943_2021_1490_MOESM1_ESM.pdf]

## Supplemental Figures

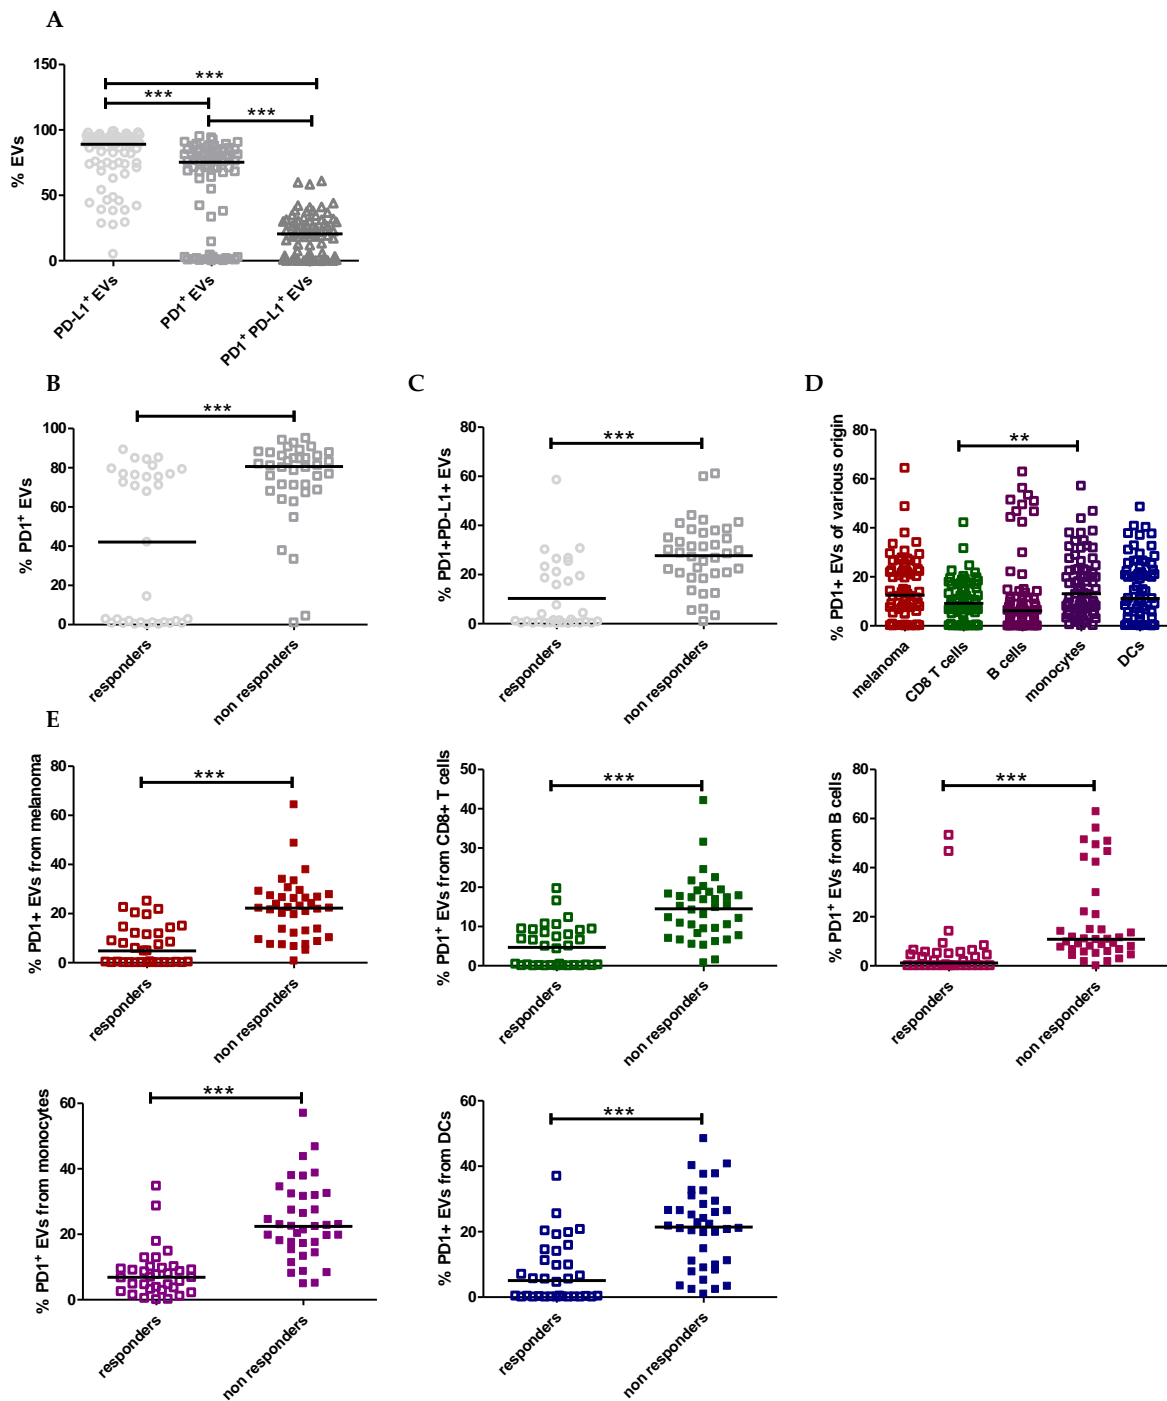

**Fig. S1** Circulating PD1<sup>+</sup> EVs derived from different cell types released clustered by response to therapy. Scatter plot with median of A. the percentage of PD-L1<sup>+</sup> EVs, PD1<sup>+</sup> EVs and PD1<sup>+</sup> PD-L1<sup>+</sup> EVs in plasma of 71 MM patients; B. the percentage of PD1<sup>+</sup> EVs from responders (n = 38) and non-responders (n = 33); C. the percentage of PD1<sup>+</sup> PD-L1<sup>+</sup> EVs from responders (n = 38) and non-responders (n = 33); D. the percentage of PD1<sup>+</sup> EVs of different origin isolated in plasma of all 71 MM patients and E. the percentage of PD1<sup>+</sup> EVs of different origin from responders (n=38) and non-responders (n=33). (Mann Whitney t test \*p < 0.05, \*\*\* p < 0.001).

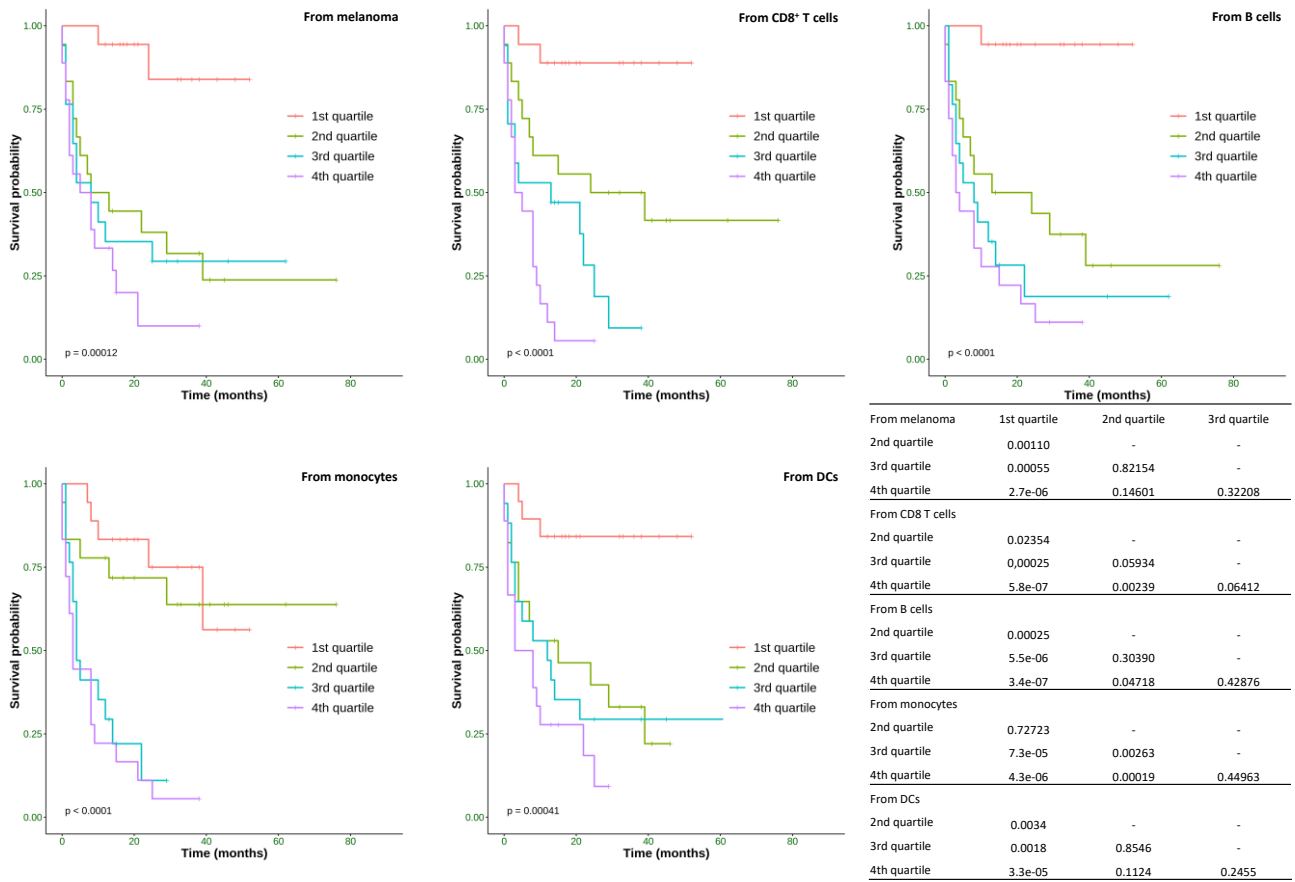

**Fig. S2** Evaluation of OS in patients with PD1+ EVs derived from melanoma cells and immune cells. Kaplan–Meier survival curve analysis according to PD1+ EVs quartiles, with these EVs from melanoma cells, CD8+ T cells, B cells, monocytes and DCs as respect to OS. For each analysis, a pairwise comparison of curves has been performed with p-values reported in tables next to each graph.

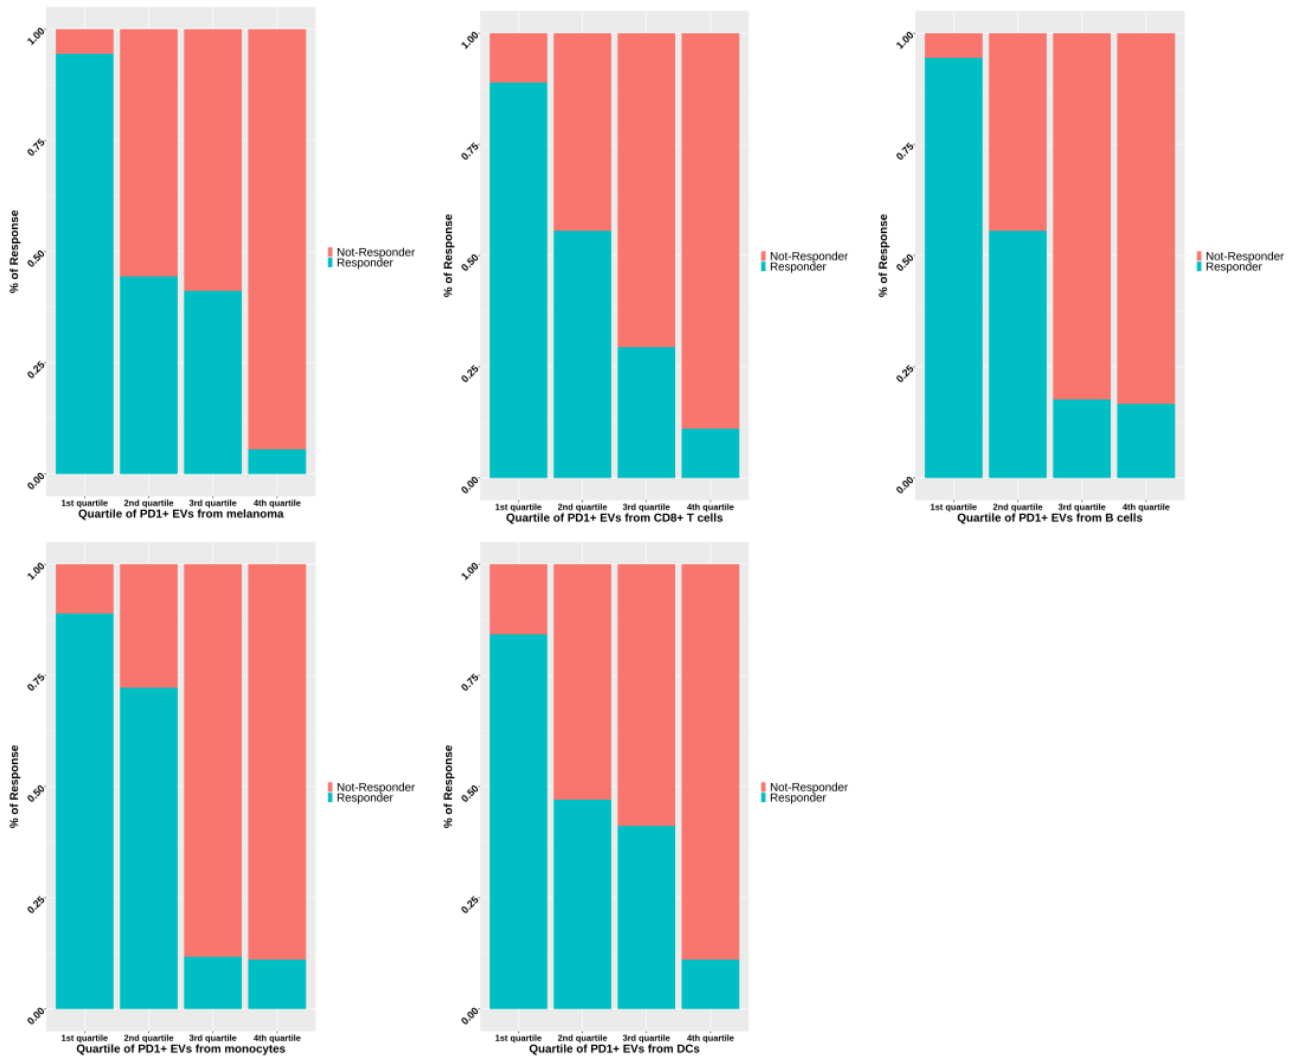

**Fig. S3 Evaluation of ORR analysis in patients with PD1+ EVs.** The distribution of the best responses stratifying patients by PD1+ EVs in responder and non-responders and coming from melanoma cells, CD8+ T cells, B cells, monocytes and DCs.

| Characteristic          | N  | HR <sup>1</sup> | 95% CI <sup>1</sup> | p-value |
|-------------------------|----|-----------------|---------------------|---------|
| PD1_EVs_from_melanoma   | 71 |                 |                     |         |
| 1st quartile            |    | —               | —                   |         |
| 2nd quartile            |    | 2.63            | 1.09, 6.35          | 0.032   |
| 3rd quartile            |    | 3.41            | 1.44, 8.09          | 0.005   |
| 4th quartile            |    | 6.97            | 2.92, 16.6          | <0.001  |
| PD1_EVs_from_CD8_Tcells | 71 |                 |                     |         |
| 1st quartile            |    | —               | —                   |         |
| 2nd quartile            |    | 1.96            | 0.80, 4.80          | 0.14    |
| 3rd quartile            |    | 4.52            | 1.90, 10.7          | <0.001  |
| 4th quartile            |    | 6.79            | 2.86, 16.1          | <0.001  |
| PD1_EVs_from_B_cells    | 71 |                 |                     |         |
| 1st quartile            |    | —               | —                   |         |
| 2nd quartile            |    | 2.45            | 1.01, 5.93          | 0.046   |
| 3rd quartile            |    | 4.55            | 1.90, 10.9          | <0.001  |
| 4th quartile            |    | 5.69            | 2.42, 13.4          | <0.001  |
| PD1_EVs_from_monocytes  | 71 |                 |                     |         |
| 1st quartile            |    | —               | —                   |         |
| 2nd quartile            |    | 1.13            | 0.46, 2.79          | 0.79    |
| 3rd quartile            |    | 5.47            | 2.38, 12.5          | <0.001  |
| 4th quartile            |    | 5.11            | 2.29, 11.4          | <0.001  |
| PD1_EVs_from_DCs        | 71 |                 |                     |         |

| Characteristic           | N  | HR <sup>1</sup> | 95% CI <sup>1</sup> | p-value |
|--------------------------|----|-----------------|---------------------|---------|
| 1st quartile             |    | —               | —                   |         |
| 2nd quartile             |    | 2.39            | 1.02, 5.60          | 0.045   |
| 3rd quartile             |    | 2.64            | 1.13, 6.22          | 0.026   |
| 4th quartile             |    | 6.25            | 2.74, 14.2          | <0.001  |
| PDL1_EVs_from_DCs        | 71 |                 |                     |         |
| 1st quartile             |    | —               | —                   |         |
| 2nd quartile             |    | 1.66            | 0.75, 3.69          | 0.21    |
| 3rd quartile             |    | 1.82            | 0.82, 4.07          | 0.14    |
| 4th quartile             |    | 1.88            | 0.86, 4.11          | 0.11    |
| PDL1_EVs_from_melanoma   | 71 |                 |                     |         |
| 1st quartile             |    | —               | —                   |         |
| 2nd quartile             |    | 1.88            | 0.81, 4.36          | 0.14    |
| 3rd quartile             |    | 2.06            | 0.90, 4.70          | 0.088   |
| 4th quartile             |    | 4.06            | 1.85, 8.91          | <0.001  |
| PDL1_EVs_from_CD8_Tcells | 71 |                 |                     |         |
| 1st quartile             |    | —               | —                   |         |
| 2nd quartile             |    | 1.40            | 0.62, 3.19          | 0.42    |
| 3rd quartile             |    | 2.07            | 0.92, 4.63          | 0.077   |
| 4th quartile             |    | 2.30            | 1.07, 4.94          | 0.033   |
| PDL1_EVs_from_B_cells    | 71 |                 |                     |         |
| 1st quartile             |    | —               | —                   |         |

| Characteristic           | N  | HR <sup>1</sup> | 95% CI <sup>1</sup> | p-value |
|--------------------------|----|-----------------|---------------------|---------|
| 2nd quartile             |    | 1.29            | 0.58, 2.84          | 0.53    |
| 3rd quartile             |    | 2.08            | 0.95, 4.55          | 0.065   |
| 4th quartile             |    | 1.37            | 0.61, 3.06          | 0.44    |
| PDL1_EVs_from_monocytes  | 71 |                 |                     |         |
| 1st quartile             |    | —               | —                   |         |
| 2nd quartile             |    | 0.97            | 0.46, 2.08          | 0.95    |
| 3rd quartile             |    | 1.21            | 0.57, 2.57          | 0.63    |
| 4th quartile             |    | 0.80            | 0.37, 1.77          | 0.59    |
| uPAR_EVs_from_melanoma   | 71 |                 |                     |         |
| 1st quartile             |    | —               | —                   |         |
| 2nd quartile             |    | 2.17            | 0.88, 5.32          | 0.092   |
| 3rd quartile             |    | 4.76            | 2.01, 11.3          | <0.001  |
| 4th quartile             |    | 6.70            | 2.81, 16.0          | <0.001  |
| uPAR_EVs_from_CD8_Tcells | 71 |                 |                     |         |
| 1st quartile             |    | —               | —                   |         |
| 2nd quartile             |    | 1.76            | 0.74, 4.20          | 0.20    |
| 3rd quartile             |    | 3.07            | 1.34, 7.06          | 0.008   |
| 4th quartile             |    | 5.01            | 2.18, 11.5          | <0.001  |
| uPAR_EVs_from_B_cells    | 71 |                 |                     |         |
| 1st quartile             |    | —               | —                   |         |
| 2nd quartile             |    | 2.43            | 1.12, 5.29          | 0.025   |

| Characteristic                          | N  | HR <sup>1</sup> | 95% CI <sup>1</sup> | p-value |
|-----------------------------------------|----|-----------------|---------------------|---------|
| 3rd quartile                            |    | 1.96            | 0.87, 4.39          | 0.10    |
| 4th quartile                            |    | 1.69            | 0.76, 3.78          | 0.20    |
| uPAR_EVs_from_monocytes                 | 71 |                 |                     |         |
| 1st quartile                            |    | —               | —                   |         |
| 2nd quartile                            |    | 2.24            | 1.04, 4.85          | 0.040   |
| 3rd quartile                            |    | 2.76            | 1.24, 6.12          | 0.013   |
| 4th quartile                            |    | 0.88            | 0.37, 2.07          | 0.77    |
| uPAR_EVs_from_DCs                       | 71 |                 |                     |         |
| 1st quartile                            |    | —               | —                   |         |
| 2nd quartile                            |    | 1.26            | 0.55, 2.87          | 0.59    |
| 3rd quartile                            |    | 1.73            | 0.77, 3.87          | 0.19    |
| 4th quartile                            |    | 3.28            | 1.51, 7.17          | 0.003   |
| BRAF_status                             | 68 |                 |                     |         |
| mutated                                 |    | —               | —                   |         |
| wild-type                               |    | 0.85            | 0.49, 1.48          | 0.56    |
| Previous_therapy_for_metastatic_disease | 71 |                 |                     |         |
| No                                      |    | —               | —                   |         |
| Yes                                     |    | 1.02            | 0.59, 1.75          | 0.95    |
| Sex                                     | 71 |                 |                     |         |
| female                                  |    | —               | —                   |         |
| male                                    |    | 1.09            | 0.64, 1.87          | 0.75    |
| PLR                                     | 71 |                 |                     |         |

| Characteristic | N  | HR <sup>1</sup> | 95% CI <sup>1</sup> | p-value |
|----------------|----|-----------------|---------------------|---------|
| Low            |    | –               | –                   |         |
| High           |    | 0.86            | 0.48,1.52           | 0.61    |
| NLR            | 71 |                 |                     |         |
| Low            |    | –               | –                   |         |
| High           |    | 1.03            | 0.58,1.82           | 0.91    |

<sup>1</sup>HR = Hazard Ratio, CI = Confidence Interval

*Fig. S4 Univariate Cox-hazard regression analysis for PFS.*



| Characteristic          | N  | HR <sup>1</sup> | 95% CI <sup>1</sup> | p-value |
|-------------------------|----|-----------------|---------------------|---------|
| PD1_EVs_from_melanoma   | 71 |                 |                     |         |
| 1st quartile            |    | —               | —                   |         |
| 2nd quartile            |    | 9.18            | 2.07, 40.8          | 0.004   |
| 3rd quartile            |    | 10.0            | 2.24, 44.9          | 0.003   |
| 4th quartile            |    | 15.6            | 3.54, 68.8          | <0.001  |
| PD1_EVs_from_CD8_Tcells | 71 |                 |                     |         |
| 1st quartile            |    | —               | —                   |         |
| 2nd quartile            |    | 5.48            | 1.20, 25.2          | 0.029   |
| 3rd quartile            |    | 11.9            | 2.67, 53.1          | 0.001   |
| 4th quartile            |    | 21.2            | 4.81, 93.9          | <0.001  |
| PD1_EVs_from_B_cells    | 71 |                 |                     |         |
| 1st quartile            |    | —               | —                   |         |
| 2nd quartile            |    | 15.9            | 2.06, 122           | 0.008   |
| 3rd quartile            |    | 24.1            | 3.13, 185           | 0.002   |
| 4th quartile            |    | 33.8            | 4.46, 256           | <0.001  |
| PD1_EVs_from_monocytes  | 71 |                 |                     |         |
| 1st quartile            |    | —               | —                   |         |
| 2nd quartile            |    | 1.32            | 0.40, 4.34          | 0.64    |
| 3rd quartile            |    | 6.46            | 2.26, 18.5          | <0.001  |
| 4th quartile            |    | 8.53            | 3.07, 23.7          | <0.001  |
| PD1_EVs_from_DCs        | 71 |                 |                     |         |

| Characteristic           | N  | HR <sup>1</sup> | 95% CI <sup>1</sup> | p-value |
|--------------------------|----|-----------------|---------------------|---------|
| 1st quartile             |    | —               | —                   |         |
| 2nd quartile             |    | 5.78            | 1.63, 20.5          | 0.007   |
| 3rd quartile             |    | 6.19            | 1.74, 22.0          | 0.005   |
| 4th quartile             |    | 10.3            | 2.95, 35.7          | <0.001  |
| PDL1_EVs_from_DCs        | 71 |                 |                     |         |
| 1st quartile             |    | —               | —                   |         |
| 2nd quartile             |    | 1.35            | 0.52, 3.51          | 0.54    |
| 3rd quartile             |    | 1.88            | 0.75, 4.67          | 0.18    |
| 4th quartile             |    | 1.99            | 0.83, 4.75          | 0.12    |
| PDL1_EVs_from_melanoma   | 71 |                 |                     |         |
| 1st quartile             |    | —               | —                   |         |
| 2nd quartile             |    | 5.10            | 1.40, 18.6          | 0.013   |
| 3rd quartile             |    | 6.04            | 1.70, 21.4          | 0.005   |
| 4th quartile             |    | 10.6            | 3.10, 36.5          | <0.001  |
| PDL1_EVs_from_CD8_Tcells | 71 |                 |                     |         |
| 1st quartile             |    | —               | —                   |         |
| 2nd quartile             |    | 1.79            | 0.64, 5.06          | 0.27    |
| 3rd quartile             |    | 3.41            | 1.28, 9.12          | 0.015   |
| 4th quartile             |    | 3.18            | 1.23, 8.23          | 0.017   |
| PDL1_EVs_from_B_cells    | 71 |                 |                     |         |
| 1st quartile             |    | —               | —                   |         |

| Characteristic           | N  | HR <sup>1</sup> | 95% CI <sup>1</sup> | p-value |
|--------------------------|----|-----------------|---------------------|---------|
| 2nd quartile             |    | 1.74            | 0.67, 4.49          | 0.25    |
| 3rd quartile             |    | 2.49            | 0.98, 6.32          | 0.056   |
| 4th quartile             |    | 2.09            | 0.82, 5.30          | 0.12    |
| PDL1_EVs_from_monocytes  | 71 |                 |                     |         |
| 1st quartile             |    | —               | —                   |         |
| 2nd quartile             |    | 1.25            | 0.54, 2.89          | 0.61    |
| 3rd quartile             |    | 1.16            | 0.49, 2.74          | 0.73    |
| 4th quartile             |    | 0.84            | 0.34, 2.07          | 0.70    |
| uPAR_EVs_from_melanoma   | 71 |                 |                     |         |
| 1st quartile             |    | —               | —                   |         |
| 2nd quartile             |    | 15.7            | 2.04, 121           | 0.008   |
| 3rd quartile             |    | 24.8            | 3.26, 189           | 0.002   |
| 4th quartile             |    | 35.0            | 4.57, 268           | <0.001  |
| uPAR_EVs_from_CD8_Tcells | 71 |                 |                     |         |
| 1st quartile             |    | —               | —                   |         |
| 2nd quartile             |    | 6.95            | 1.54, 31.4          | 0.012   |
| 3rd quartile             |    | 11.5            | 2.60, 50.5          | 0.001   |
| 4th quartile             |    | 13.8            | 3.12, 61.0          | <0.001  |
| uPAR_EVs_from_B_cells    | 71 |                 |                     |         |
| 1st quartile             |    | —               | —                   |         |
| 2nd quartile             |    | 3.28            | 1.25, 8.57          | 0.016   |

| Characteristic                          | N  | HR <sup>1</sup> | 95% CI <sup>1</sup> | p-value |
|-----------------------------------------|----|-----------------|---------------------|---------|
| 3rd quartile                            |    | 2.80            | 1.03, 7.60          | 0.043   |
| 4th quartile                            |    | 2.54            | 0.93, 6.88          | 0.068   |
| uPAR_EVs_from_monocytes                 | 71 |                 |                     |         |
| 1st quartile                            |    | —               | —                   |         |
| 2nd quartile                            |    | 1.76            | 0.78, 4.00          | 0.17    |
| 3rd quartile                            |    | 1.42            | 0.59, 3.43          | 0.44    |
| 4th quartile                            |    | 0.80            | 0.31, 2.02          | 0.63    |
| uPAR_EVs_from_DCs                       | 71 |                 |                     |         |
| 1st quartile                            |    | —               | —                   |         |
| 2nd quartile                            |    | 1.98            | 0.68, 5.81          | 0.21    |
| 3rd quartile                            |    | 3.33            | 1.18, 9.39          | 0.023   |
| 4th quartile                            |    | 3.64            | 1.31, 10.2          | 0.014   |
| BRAF_status                             | 68 |                 |                     |         |
| mutated                                 |    | —               | —                   |         |
| wild-type                               |    | 0.69            | 0.37, 1.29          | 0.24    |
| Previous_therapy_for_metastatic_disease | 71 |                 |                     |         |
| No                                      |    | —               | —                   |         |
| Yes                                     |    | 1.50            | 0.81, 2.76          | 0.19    |
| Sex                                     | 71 |                 |                     |         |
| female                                  |    | —               | —                   |         |
| male                                    |    | 1.03            | 0.56, 1.89          | 0.93    |
| PLR                                     | 71 |                 |                     |         |

| Characteristic | N  | HR <sup>1</sup> | 95% CI <sup>1</sup> | p-value |
|----------------|----|-----------------|---------------------|---------|
| Low            |    | –               | –                   |         |
| High           |    | 1               | 0.98,1.01           | 0.97    |
| NLR            | 71 |                 |                     |         |
| Low            |    | –               | –                   |         |
| High           |    | 1.02            | 0.53,1.92           | 0.93    |

<sup>1</sup>HR = Hazard Ratio, CI = Confidence Interval

*Fig. S5 Univariate Cox-hazard regression analysis for OS.*

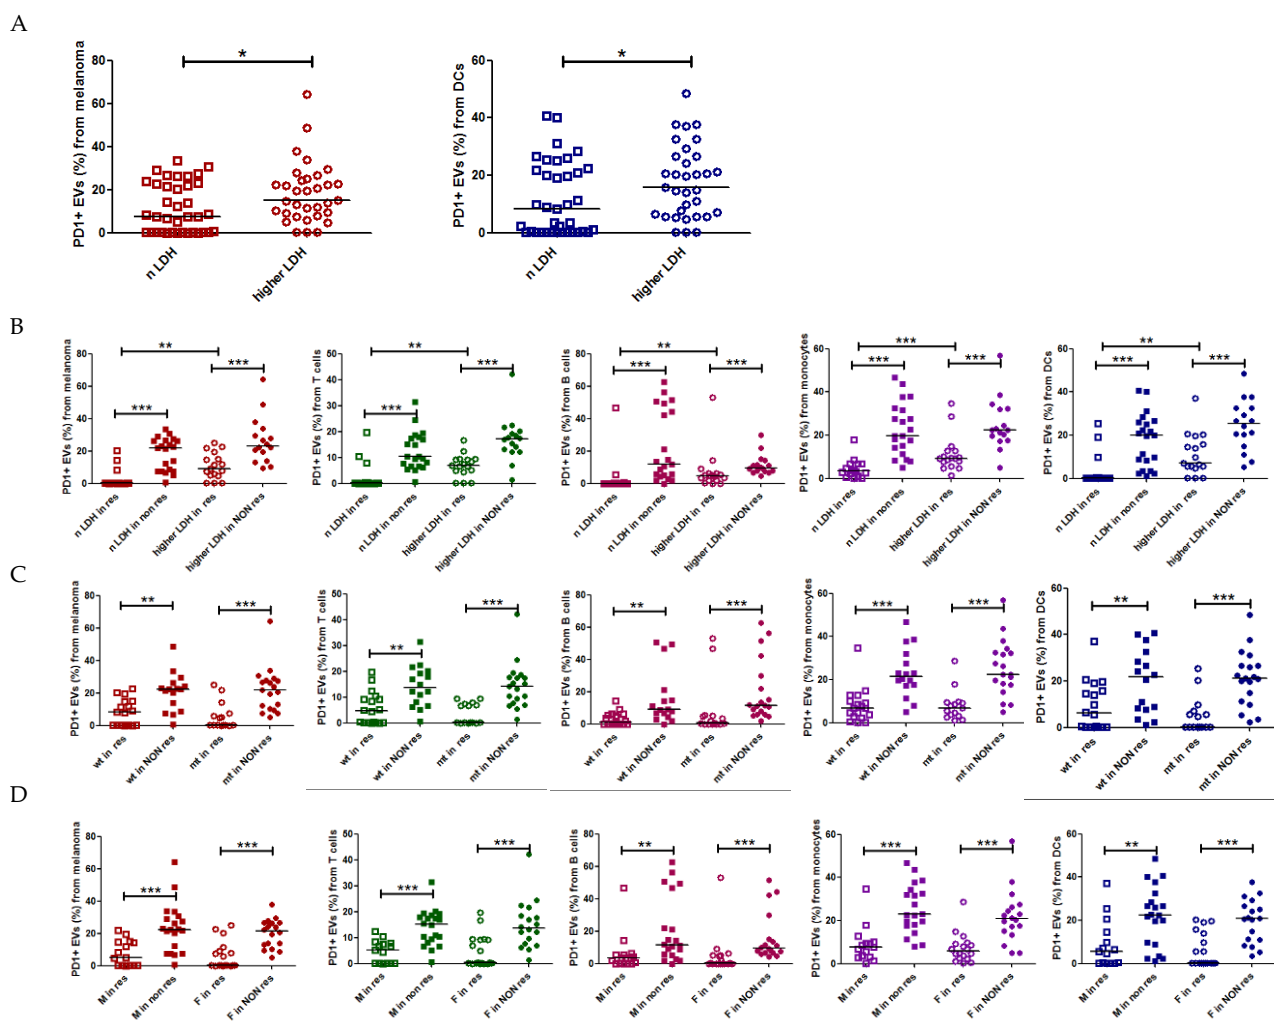

**Fig. S6. Correlation between PD1+ EVs and clinical features..** Scatter plots with median showing A. the percentage of PD1+ EVs from melanoma cells and DCs in MM patients with normal and higher LDH and the percentage of PD1+ EVs of different origin from responders and non-responders B. with normal and higher LDH, C. in BRAF mutated patients *vs* BRAF wt, D. in function of gender,. (Mann Whitney t test \*  $p < 0.05$ , \*\*  $p < 0.01$ , \*\*\*  $p < 0.001$ ).

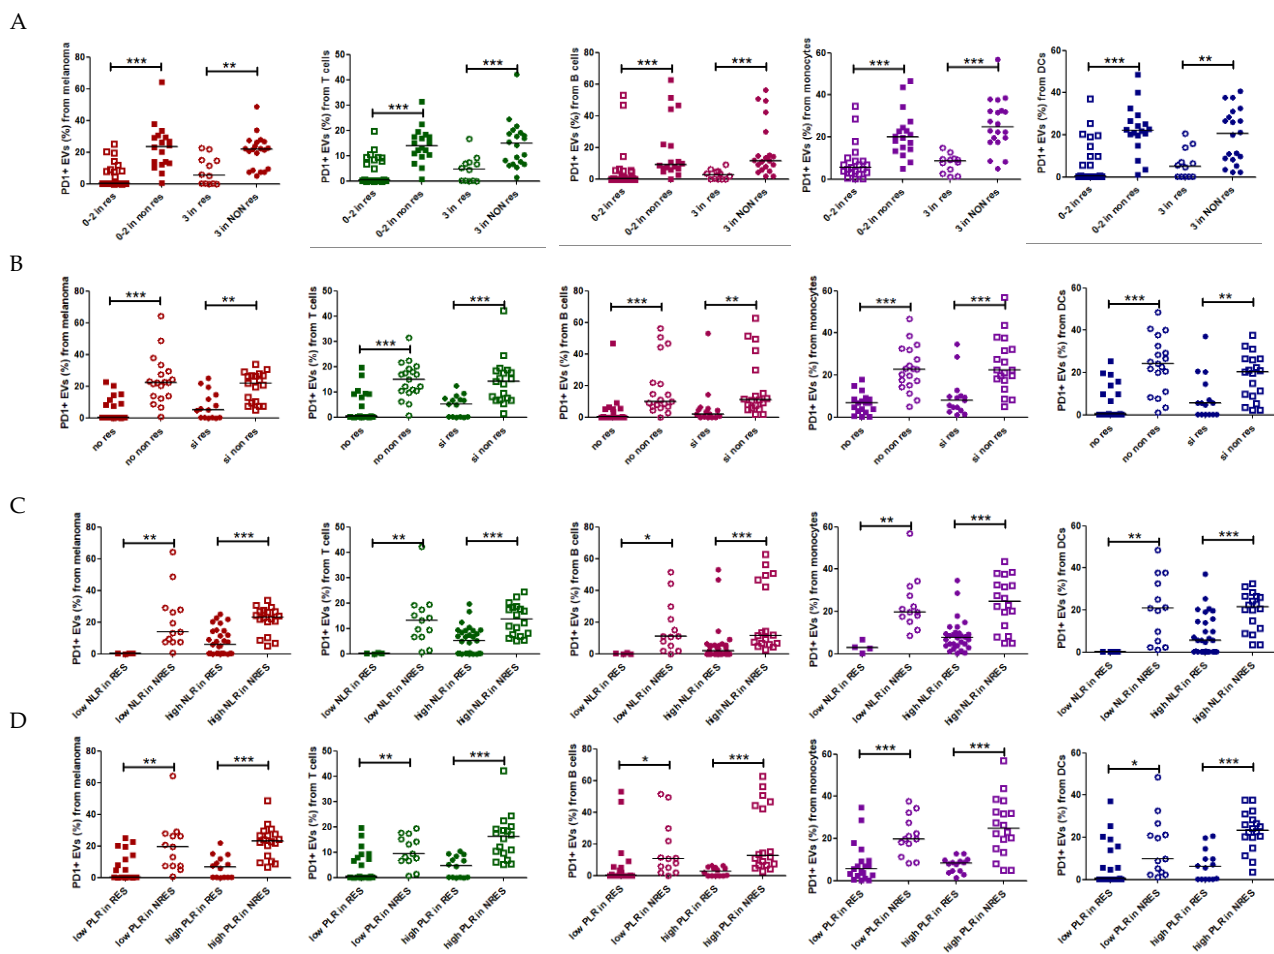

**Fig. S7. Correlation between PD1+ EVs and clinical features.** Scatter plots with median showing A. the percentage of PD1+ EVs of various cell origin A. in MM patients in function the number of metastatic site, B. in naïve *vs* pretreated MM patients, in function of C. NLR and D. PLR. (Mann Whitney t test \*  $p < 0.05$ , \*\*  $p < 0.01$ , \*\*\*  $p < 0.001$ ).
